# Supplementary material for: A novel small molecule STAT3 inhibitor, LY5, inhibits cell viability, colony formation, and migration of colon and liver cancer cells
Source: PubMed Central journal article supplement (PMC4914331; doi:10.18632/oncotarget.7338), 2016-02-11
Supplement: oncotarget-07-12917-s001.pdf [file oncotarget-07-12917-s001.pdf]

## A novel small molecule STAT3 inhibitor, LY5, inhibits cell viability, colony formation, and migration of colon and liver cancer cells

### Supplementary Materials

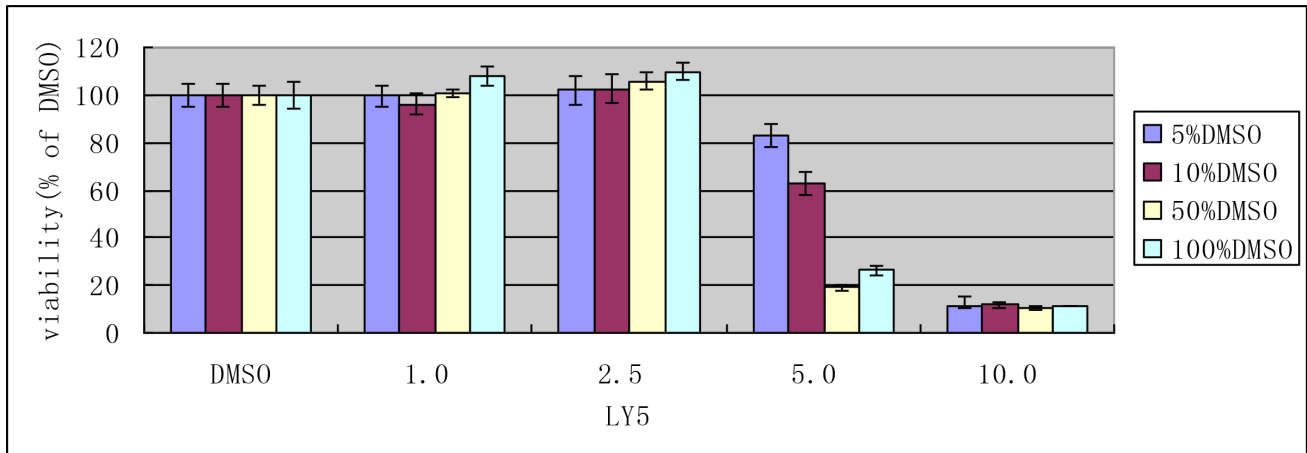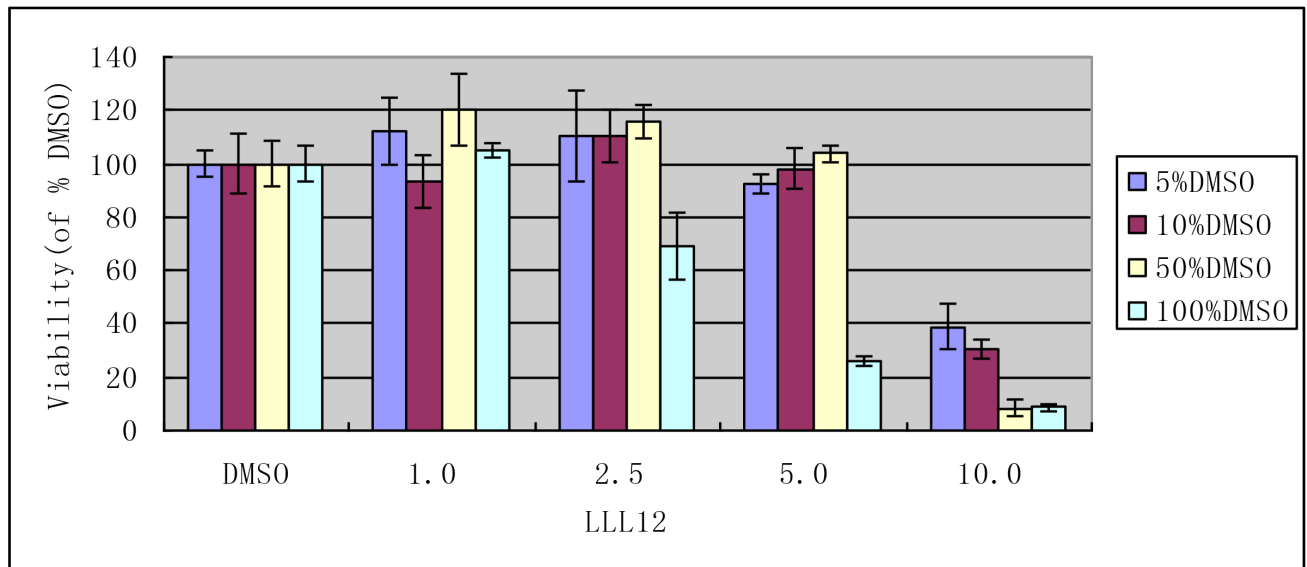

Supplementary Figure S1: Comparison of LY5 and LLL12 in inhibiting cell viability in Hep3B liver cancer cells.

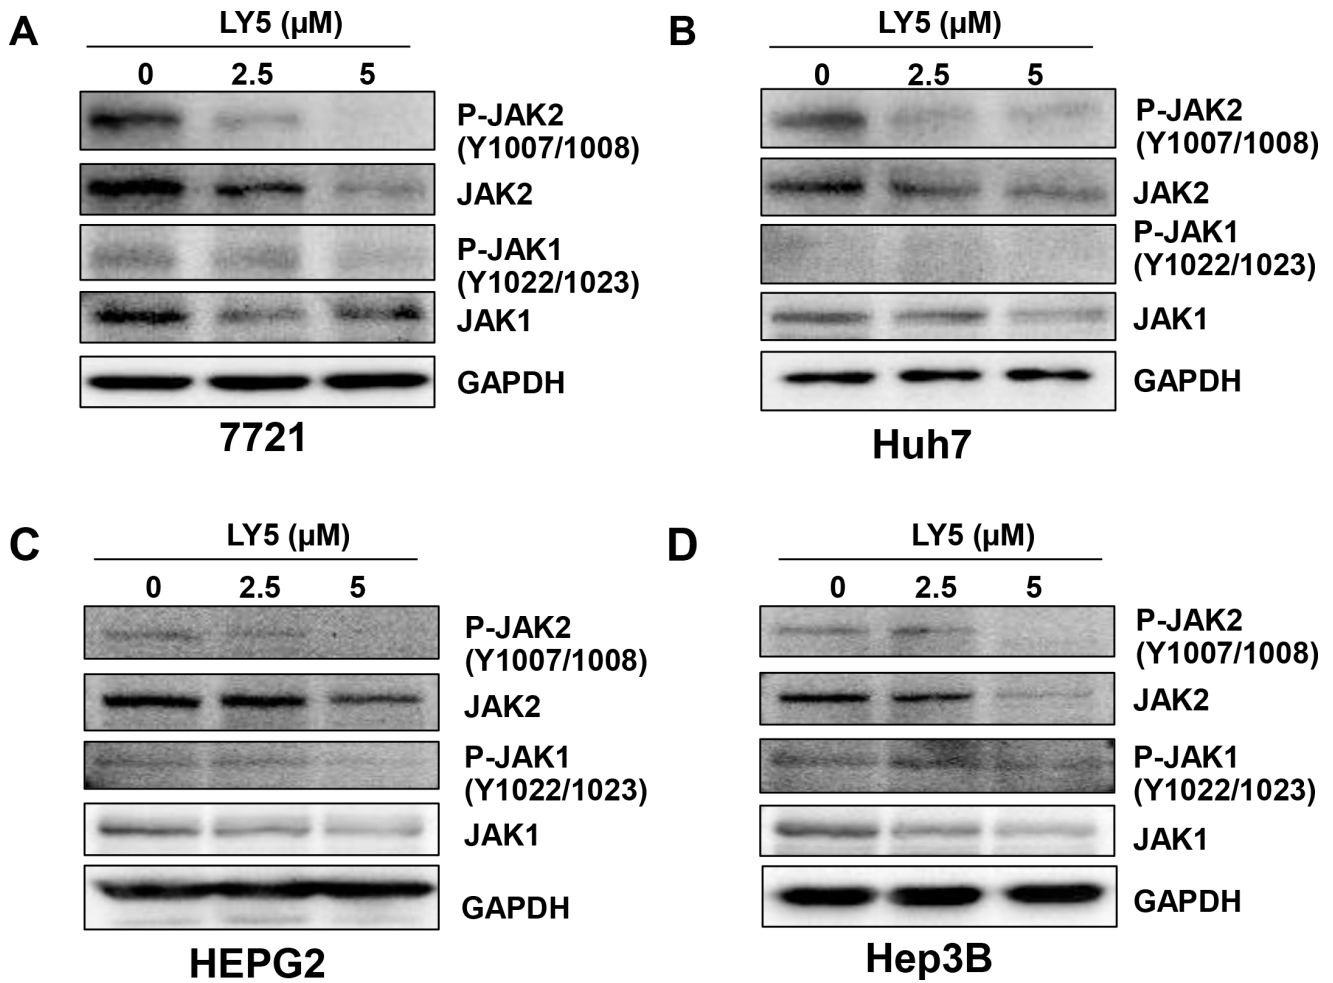

Supplementary Figure S2: The effects of LY5 on JAK1/P-JAK1 and JAK2/P-JAK2 in liver cancer cell lines.

**A**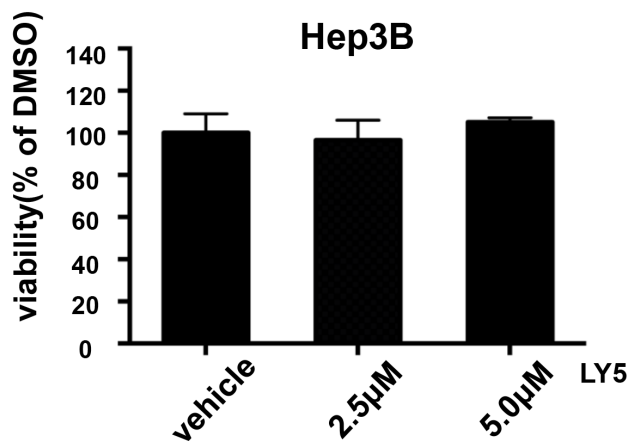**B**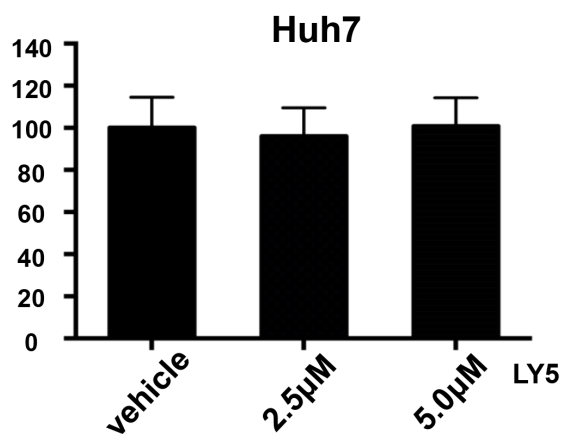**C**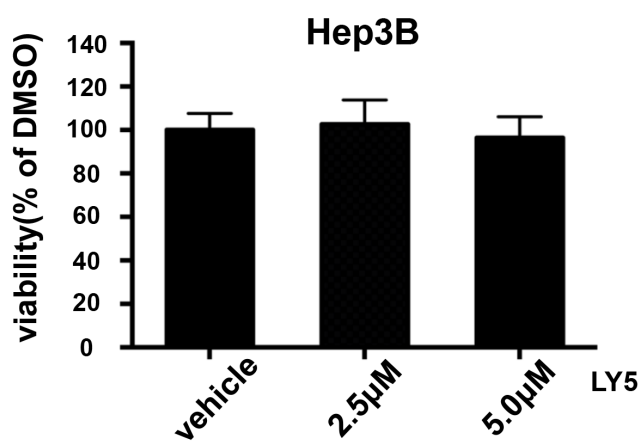**D**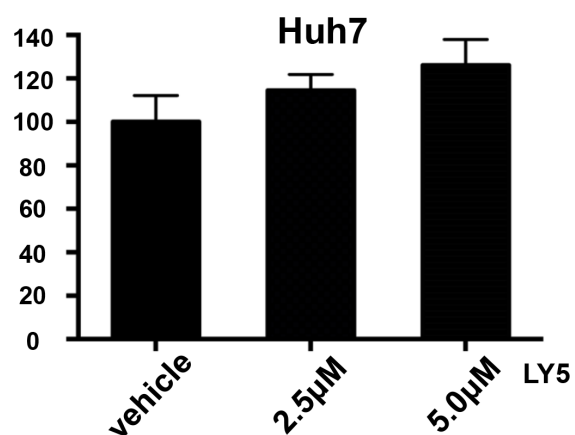

**Supplementary Figure S3: The ability of LY5 to inhibit cell migration and colony formation is not due to induction of cell death.** The time points of treatment with LY5 and incubation without LY5 used in wound healing assay and colony formation was applied in viability assay.

|                               |   |   |   |
|-------------------------------|---|---|---|
| LY5 (5 $\mu$ M, pretreat 2h ) | - | - | + |
| IL-6 (25ng/mL, 30min)         | - | + | + |

serum-starved for 12 hours

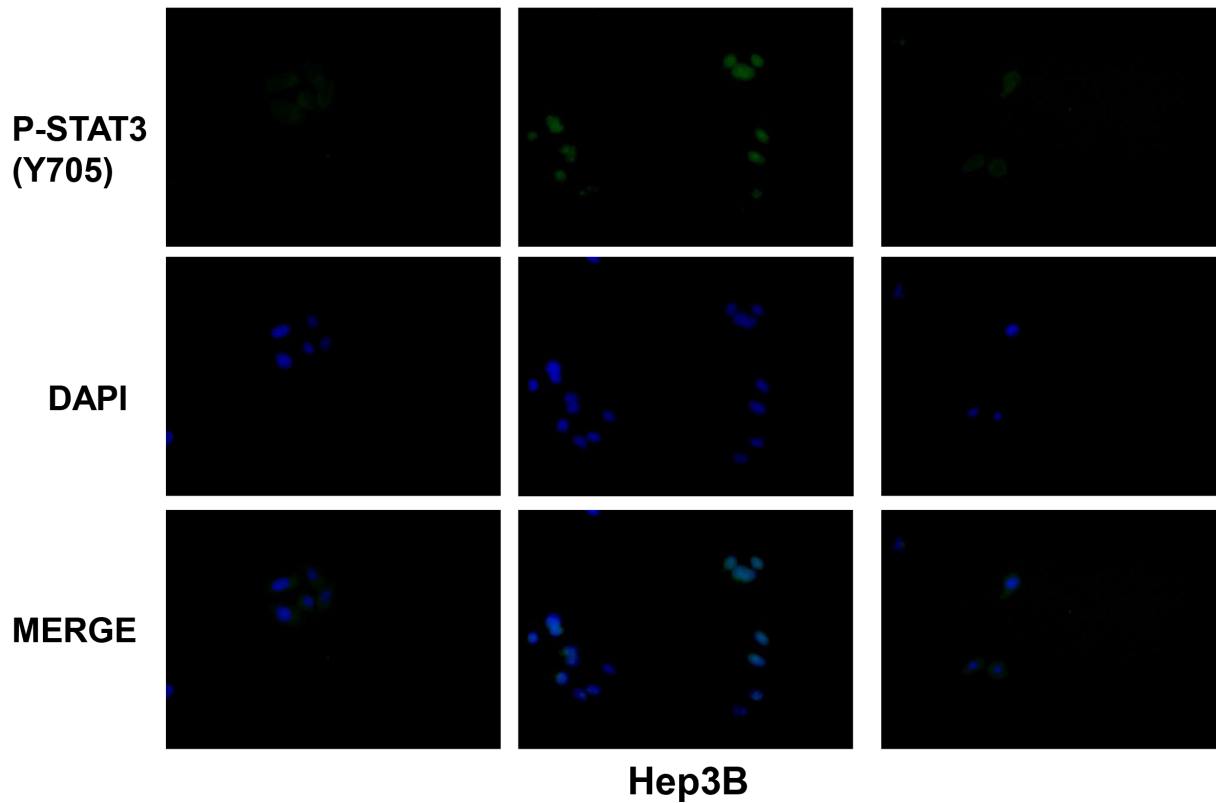

**Supplementary Figure S4: LY5 inhibited STAT3 phosphorylation induced by cytokine IL-6 in Hep3B liver cancer cells.** Hep3B liver cancer cells were plated on cover slides overnight and cultured in serum-free medium for 12 hours, then treated or untreated with the indicated concentrations of LY5. After 2 hours, the cells were stimulated by IL-6 (25 ng/mL) for 30 min, then analyzed for STAT3 phosphorylation by immunofluorescence staining as described in Materials and Methods.



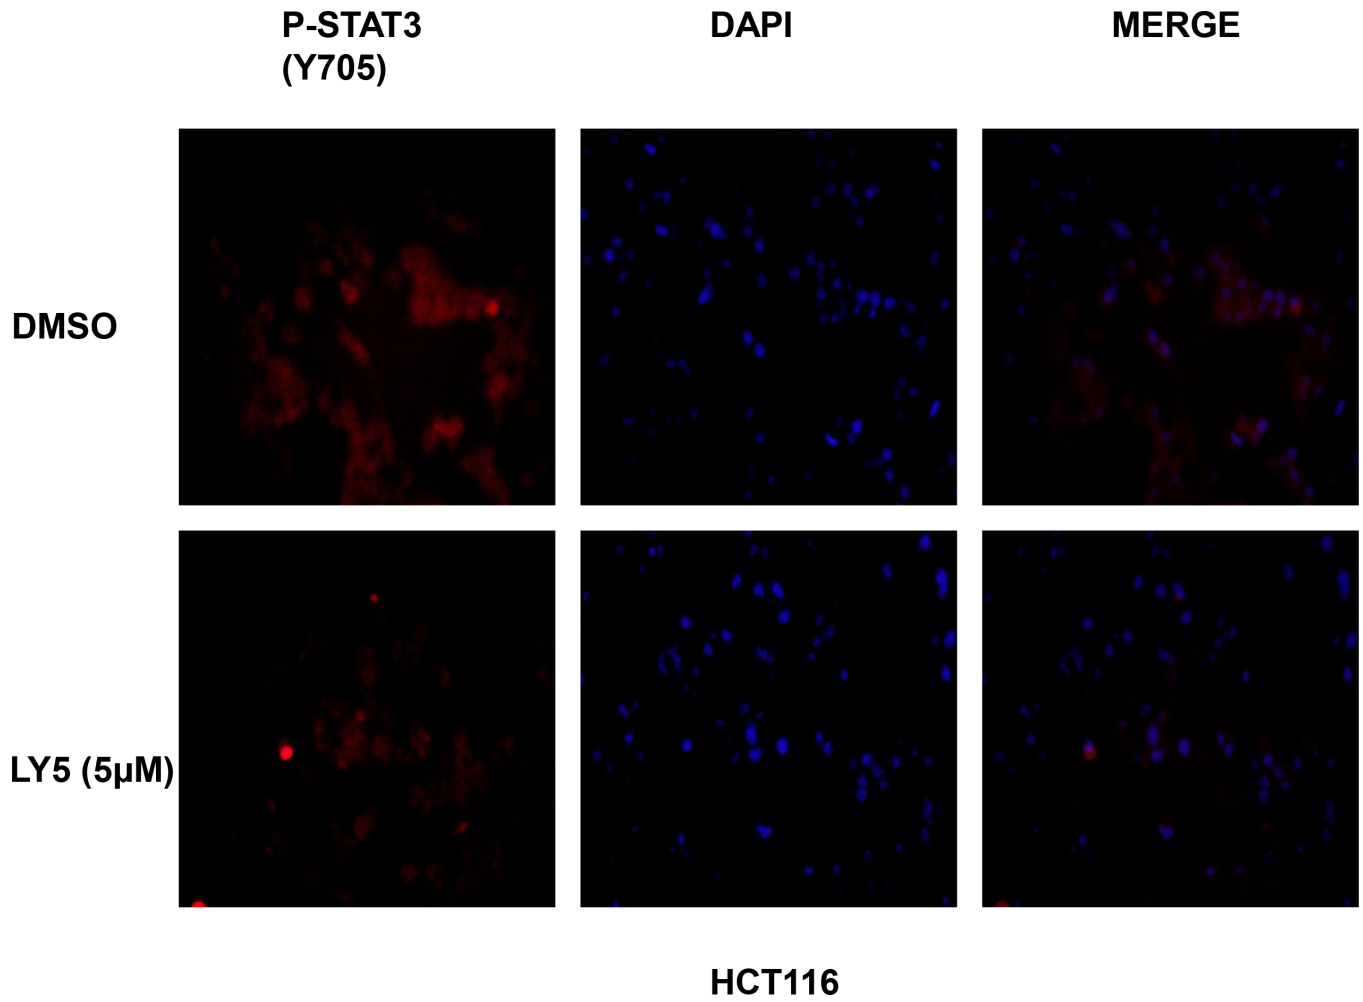

Supplementary Figure S5: LY5 inhibited STAT3 phosphorylation in the nuclei of HCT116 colon cancer cells.

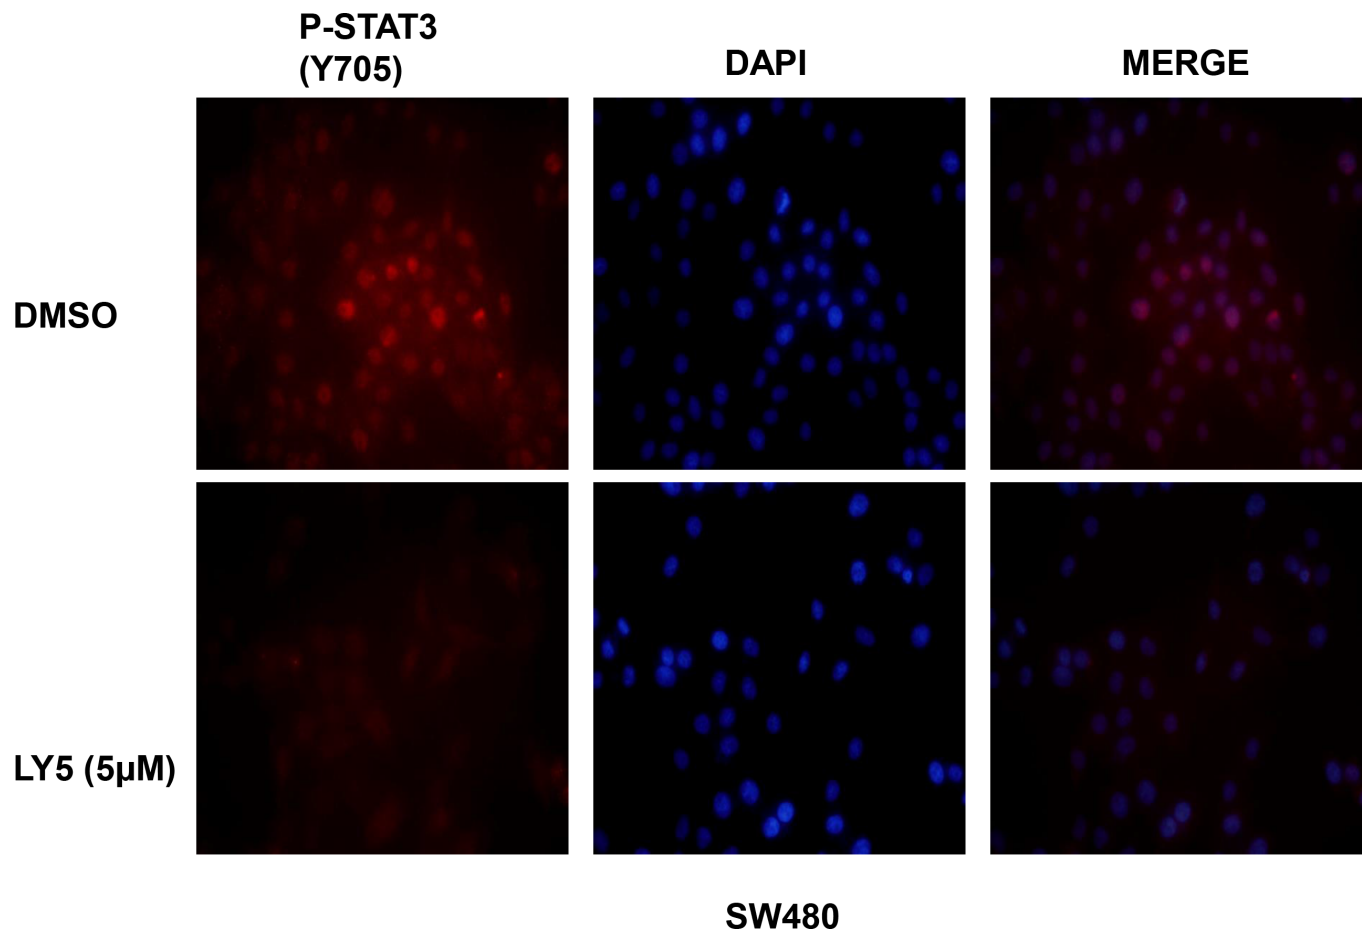

Supplementary Figure S6: LY5 inhibited STAT3 phosphorylation in the nuclei of SW480 colon cancer cells.

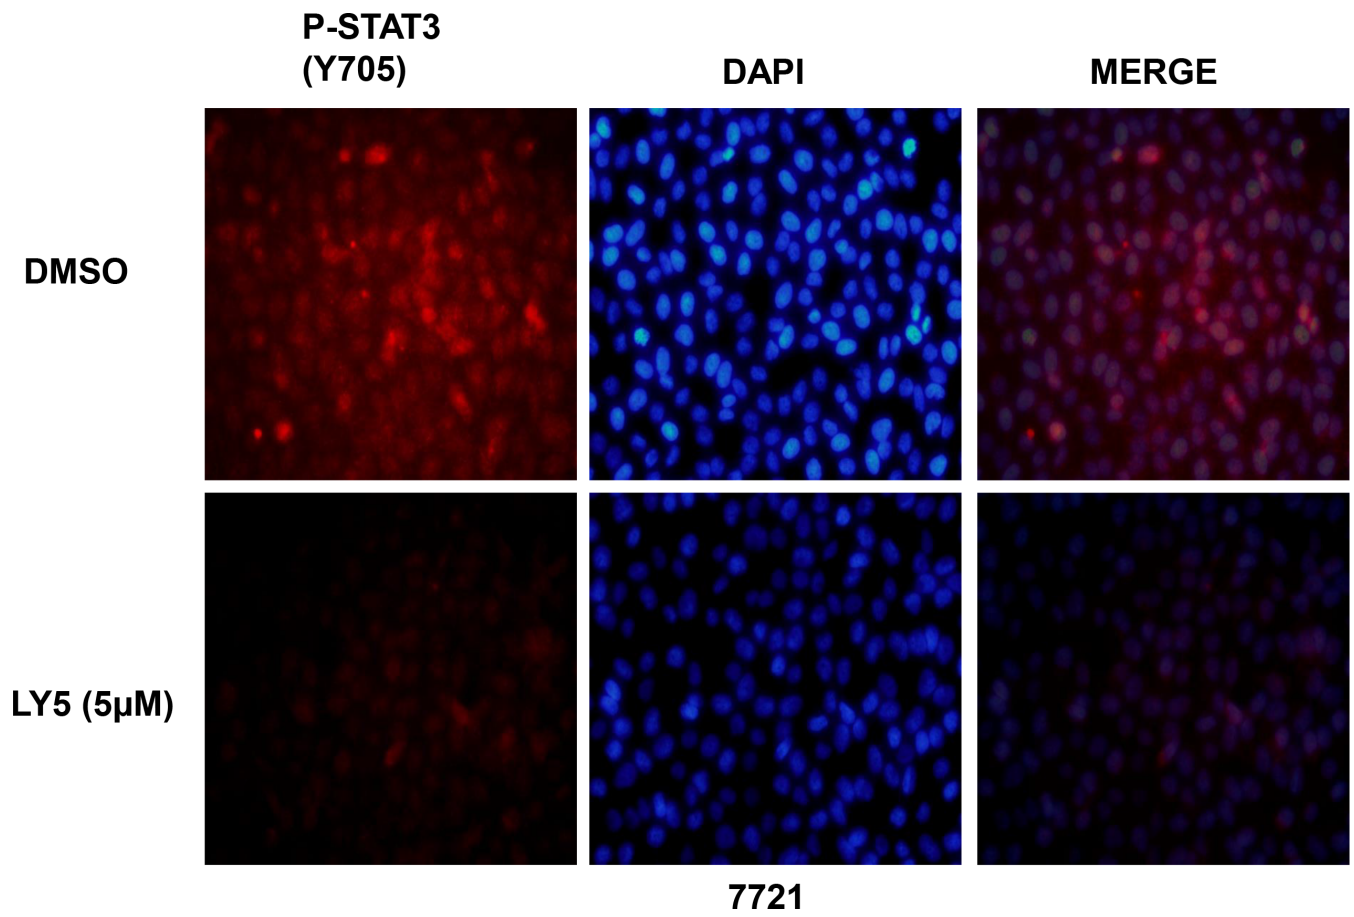

Supplementary Figure S7: LY5 inhibited STAT3 phosphorylation in the nuclei of 7721 liver cancer cells.

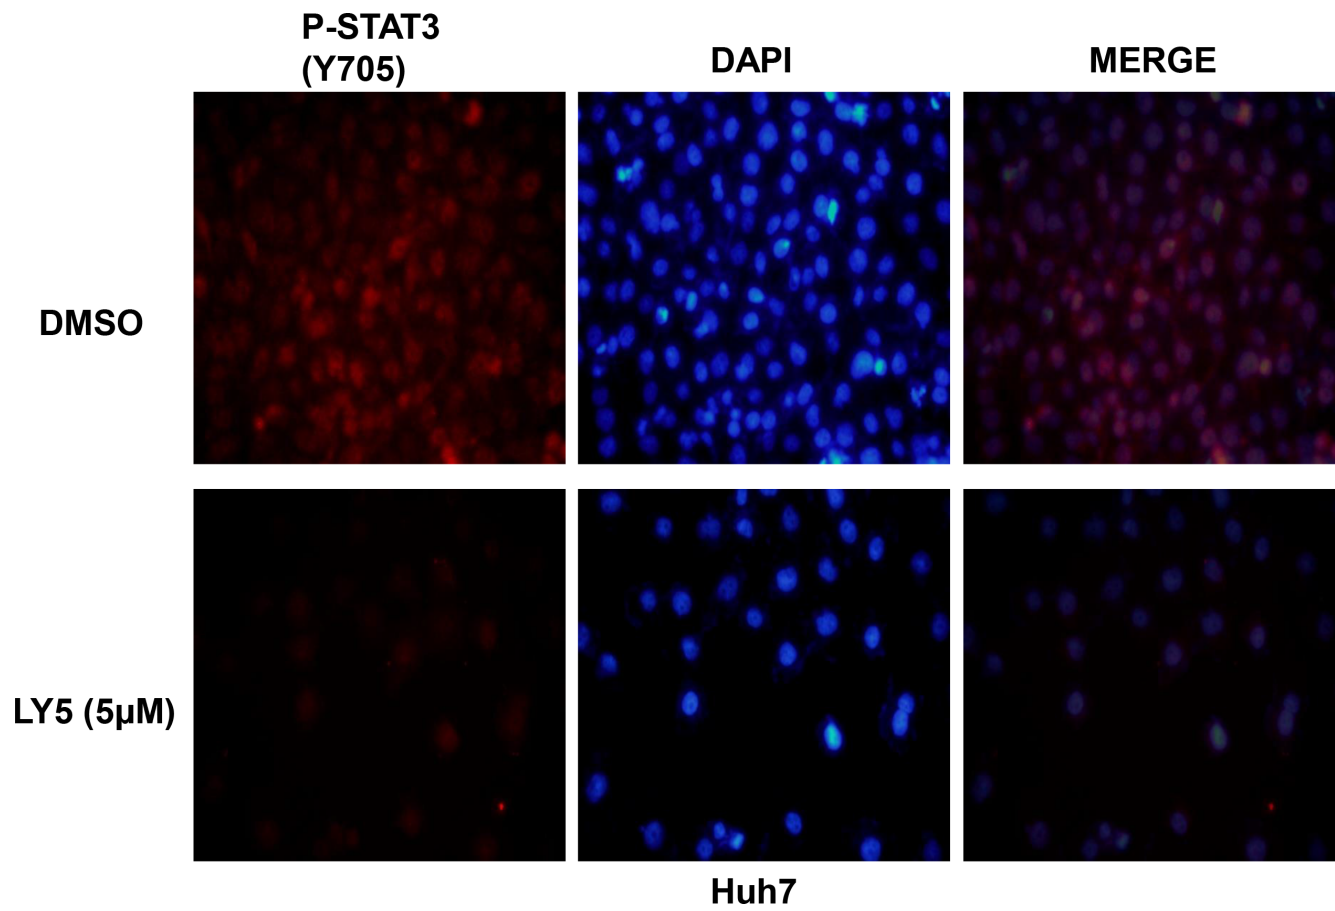

Supplementary Figure S8: LY5 inhibited STAT3 phosphorylation in the nuclei of Huh7 liver cancer cells.

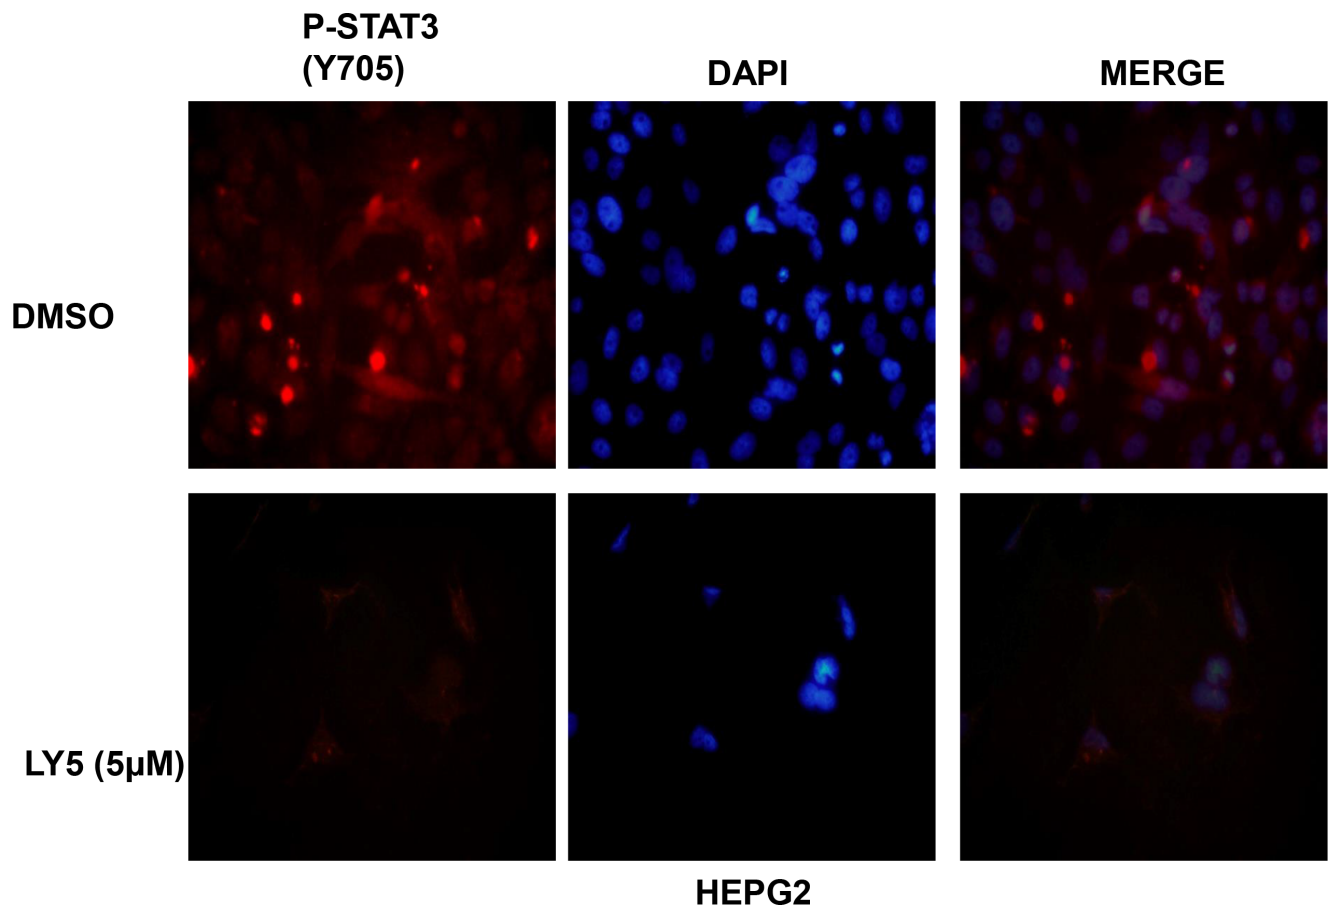

Supplementary Figure S9: LY5 inhibited STAT3 phosphorylation in the nuclei of HEPG2 liver cancer cells.

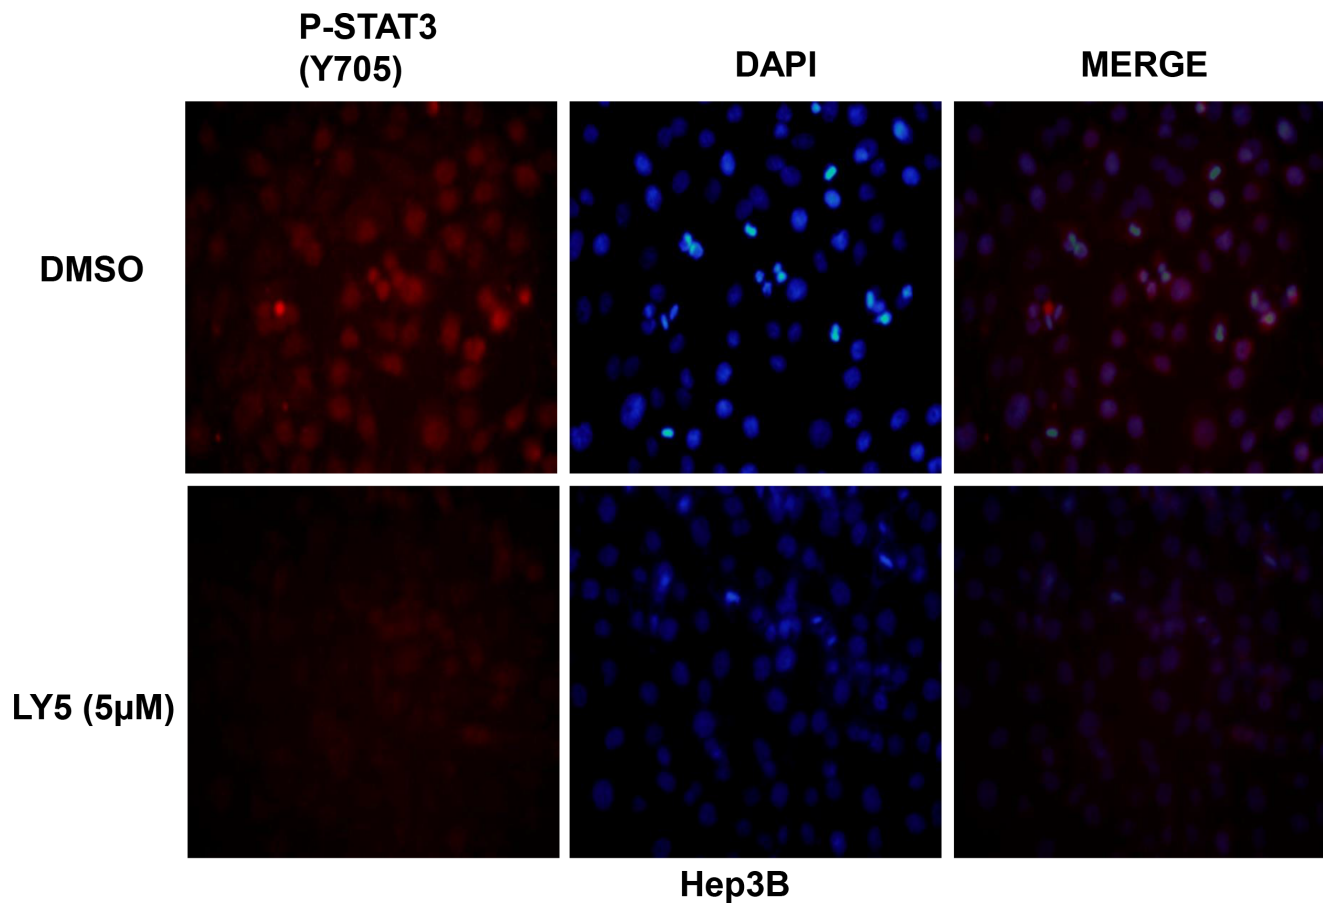

Supplementary Figure S10: LY5 inhibited STAT3 phosphorylation in the nuclei of Hep3B liver cancer cells.

**Supplementary Table S1: IC50 ( $\mu\text{M}$ ) of LLL12 and LY5 in Hep3B liver cancer cells**

| <b>DMSO</b> | <b>LLL12</b> | <b>LY5</b> |
|-------------|--------------|------------|
| 5%          | 9.054        | 6.345      |
| 10%         | 9.11         | 5.02       |
| 50%         | 7.146        | 1.242      |
| 100%        | 3.8          | 2.539      |

LLL12 and LY5 were dissolved in 5, 10, 50, and 100% DMSO respectively.

**Supplementary Table S2: IC50 ( $\mu\text{M}$ ) of LY5 in human liver and colon cancer cells**

|     | <b>Human liver cancer cells</b> |             |             | <b>Human colon cancer cells</b> |             |              |
|-----|---------------------------------|-------------|-------------|---------------------------------|-------------|--------------|
|     | <b>Hep3B</b>                    | <b>Huh7</b> | <b>7721</b> | <b>HCT116</b>                   | <b>DLD1</b> | <b>SW480</b> |
| LY5 | 3.263                           | 1.637       | 3.347       | 1.690                           | 1.370       | 1.235        |
